# Supplementary material for: Identifying Health-Related Conditions Associated with Tinnitus in Young Adults
Source: MDPI journal article supplement (doi:10.3390/audiolres13040048), 2023-07-20
Supplement: s1 [file s1]

### Supplementary Files

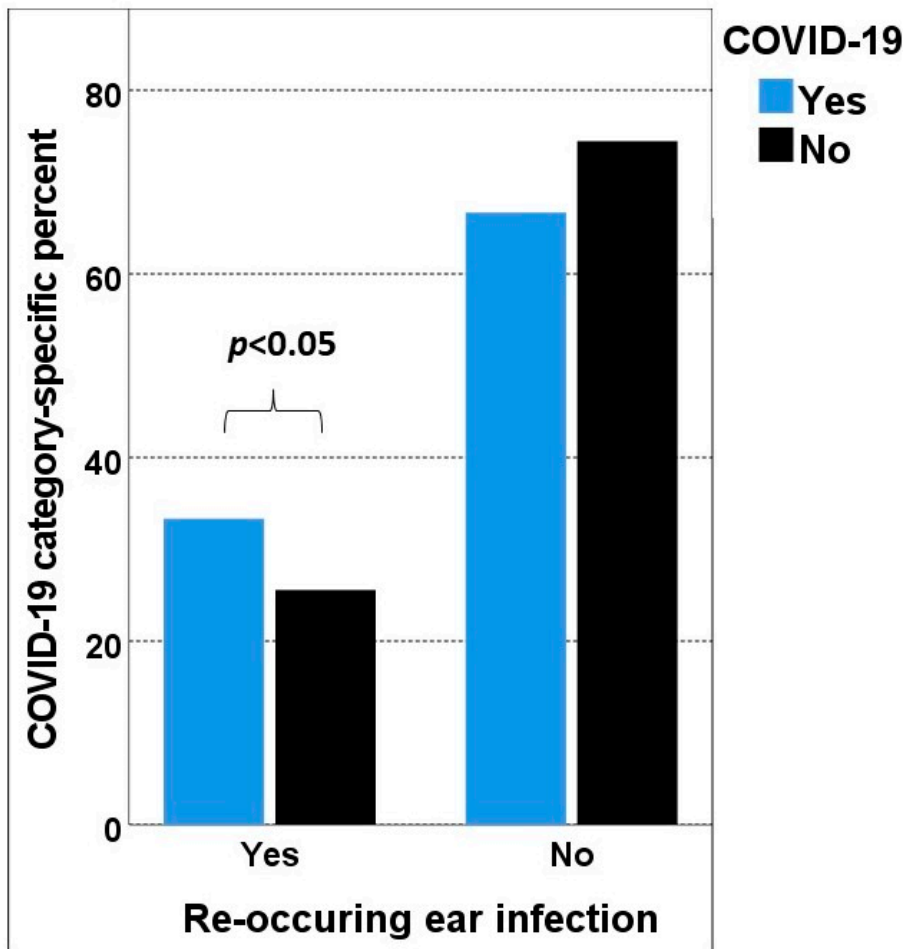

Figure S1: A bar chart showing the prevalence of COVID-19 between individuals with and without a history of reoccurring ear infections. Individuals with reoccurring ear infections reported a significantly higher prevalence of COVID-19 (NT – Not tinnitus, SAT = subacute tinnitus, AT – acute tinnitus, and CT – chronic tinnitus).

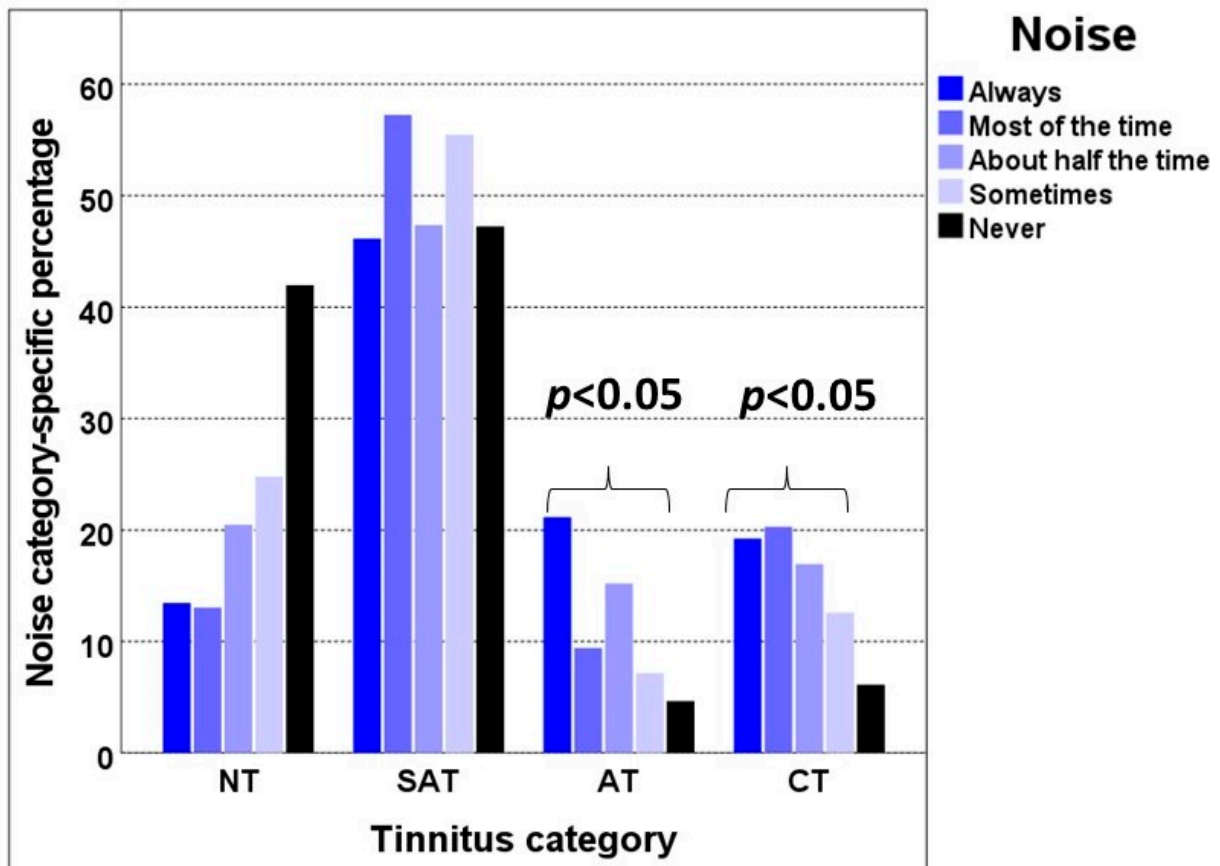

Figure S2: A bar chart showing the noise category-specific prevalence of tinnitus. The prevalence of chronic tinnitus rises from about 6% to 20% as a function of the noise exposure category, showing that chronic tinnitus is significantly associated with noise exposure (NT – Not tinnitus, SAT = subacute tinnitus, AT – acute tinnitus, and CT – chronic tinnitus).

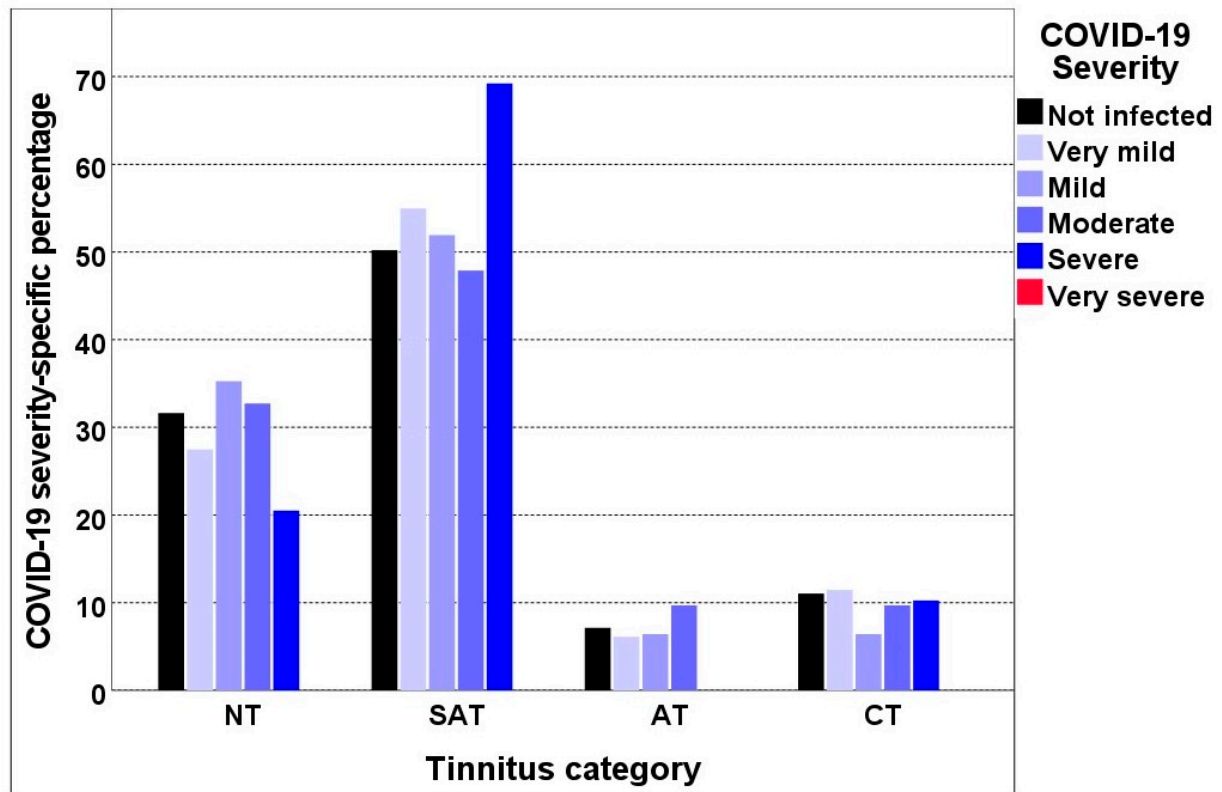

**Figure S3:** A bar chart showing the COVID-19 severity-specific percentage among tinnitus categories, suggesting no significant association between COVID-19 and tinnitus category in young adults (NT – Not tinnitus, SAT = subacute tinnitus, AT – acute tinnitus, and CT – chronic tinnitus).

Table S1. Study Questionnaire

| <b>Study Questionnaire</b>                                                                                                                                                                                                                                                                                                                                                                                                                                                                                                                                                                                                                                                                                                                                                                                                                                                                                                                                                                                                                                                                                                                                                                                                               |                            |
|------------------------------------------------------------------------------------------------------------------------------------------------------------------------------------------------------------------------------------------------------------------------------------------------------------------------------------------------------------------------------------------------------------------------------------------------------------------------------------------------------------------------------------------------------------------------------------------------------------------------------------------------------------------------------------------------------------------------------------------------------------------------------------------------------------------------------------------------------------------------------------------------------------------------------------------------------------------------------------------------------------------------------------------------------------------------------------------------------------------------------------------------------------------------------------------------------------------------------------------|----------------------------|
| Please read all the questions carefully before answering them.                                                                                                                                                                                                                                                                                                                                                                                                                                                                                                                                                                                                                                                                                                                                                                                                                                                                                                                                                                                                                                                                                                                                                                           |                            |
| <b>1</b>                                                                                                                                                                                                                                                                                                                                                                                                                                                                                                                                                                                                                                                                                                                                                                                                                                                                                                                                                                                                                                                                                                                                                                                                                                 | <b>Demographic Details</b> |
| <p><b>What is your age?</b><br/>_____ years</p> <p><b>What is your gender?</b><br/> <input type="checkbox"/> Male<br/> <input type="checkbox"/> Female<br/> <input type="checkbox"/> Other (Please specify): _____<br/> <input type="checkbox"/> No disclosure         </p> <p><b>What is your ethnicity? Please check all that apply.</b></p> <div style="display: flex; justify-content: space-between;"> <div style="width: 60%;"> <input type="checkbox"/> Black/ African American/ Afro Caribbean<br/> <input type="checkbox"/> White<br/> <input type="checkbox"/> Hispanic/ Latino<br/> <input type="checkbox"/> Native Hawaiian/Other Pacific Islander<br/> <input type="checkbox"/> American Indian/ Alaskan Native         </div> <div style="width: 35%;"> <input type="checkbox"/> Middle Eastern<br/> <input type="checkbox"/> South Asian<br/> <input type="checkbox"/> East Asian<br/> <input type="checkbox"/> Other _____         </div> </div>                                                                                                                                                                                                                                                                         |                            |
| <b>2</b>                                                                                                                                                                                                                                                                                                                                                                                                                                                                                                                                                                                                                                                                                                                                                                                                                                                                                                                                                                                                                                                                                                                                                                                                                                 | <b>Tinnitus</b>            |
| <p><b>In the past 12 months, have you been bothered by ringing, roaring, buzzing, or any other type of sounds in ears or head that lasts for <u>5 minutes or more</u>?</b><br/> <input type="checkbox"/> Yes <input type="checkbox"/> No         </p> <p><b>If you answered “Yes” to the above question, then please answer how long have you been bothered by this ringing, roaring, or buzzing in ears or head?</b></p> <div style="display: flex; justify-content: space-between;"> <div style="width: 45%;"> <input type="checkbox"/> Less than three months<br/><br/> <input type="checkbox"/> 1 to 4 years<br/> <input type="checkbox"/> 10 or more years         </div> <div style="width: 45%;"> <input type="checkbox"/> Three months to a year<br/><br/> <input type="checkbox"/> 5 to 9 years<br/> <input type="checkbox"/> Don't know         </div> </div> <p><b>Have you <u>ever</u> experienced ringing, roaring, or buzzing in your ears/head?</b><br/> <input type="checkbox"/> Yes <input type="checkbox"/> No         </p> <p><b>If yes, do you hear continuous ringing, roaring, or buzzing <u>in silence when you pay attention</u>?</b><br/> <input type="checkbox"/> Yes <input type="checkbox"/> No         </p> |                            |
| <b>3</b>                                                                                                                                                                                                                                                                                                                                                                                                                                                                                                                                                                                                                                                                                                                                                                                                                                                                                                                                                                                                                                                                                                                                                                                                                                 | <b>Overall health</b>      |
| <p><b>What illnesses do you have, or have you had? Please check all that apply.</b> <input type="checkbox"/> None</p> <p>Please select all that apply:</p> <div style="display: flex; justify-content: space-between;"> <div style="width: 40%;"> <input type="checkbox"/> Meningitis<br/> <input type="checkbox"/> High Blood Pressure<br/><br/> <input type="checkbox"/> Scarlet fever         </div> <div style="width: 20%; text-align: center;"> <input type="checkbox"/> Diabetes         </div> <div style="width: 35%;"> <input type="checkbox"/> Heart disease<br/> <input type="checkbox"/> Head Injury         </div> </div> <p><b>Please list other health conditions that you have or had in the past (including physical and mental health conditions):</b></p> <p>_____</p> <p>_____</p> <p>_____</p>                                                                                                                                                                                                                                                                                                                                                                                                                     |                            |

|                                                                                                                                                                                                                                                                                                                                                                                                                                                                                                                                                    |                       |
|----------------------------------------------------------------------------------------------------------------------------------------------------------------------------------------------------------------------------------------------------------------------------------------------------------------------------------------------------------------------------------------------------------------------------------------------------------------------------------------------------------------------------------------------------|-----------------------|
| <b>Have you ever been infected with COVID-19?</b> <input type="checkbox"/> Yes <input type="checkbox"/> No<br><b>If yes, please indicate overall symptom severity while you were infected:</b><br><input type="checkbox"/> Very mild <input type="checkbox"/> Mild <input type="checkbox"/> Moderate <input type="checkbox"/> Severe <input type="checkbox"/> Very severe                                                                                                                                                                          |                       |
| <b>4</b>                                                                                                                                                                                                                                                                                                                                                                                                                                                                                                                                           | <b>Hearing health</b> |
| <b>Do you have a history of ear infections?</b> <input type="checkbox"/> Yes <input type="checkbox"/> No<br><br><b>Ever had 3 or more ear infections?</b> <input type="checkbox"/> Yes <input type="checkbox"/> No<br><br><b>Have you been exposed to loud recreational or occupational noise/music for more than 10 hours a week over the past year?</b> <input type="checkbox"/> Never <input type="checkbox"/> Sometimes <input type="checkbox"/> About half the time <input type="checkbox"/> Most of the time <input type="checkbox"/> Always |                       |
